# Supplementary material
Source: PubMed Central journal article supplement (PMC2864305)
Supplement: NIHMS188985-supplement-1_si_001.pdf [file NIHMS188985-supplement-1_si_001.pdf]

Supplementary table S1

Table 1S: Primers used to generate R548K, R548Q, R548A, Q552N and Q552A mutants

| name of primer | DNA sequence <sup>a</sup>                    |
|----------------|----------------------------------------------|
| R548K-F        | 5'-cgacaccacgatg <b>agg</b> acggcaccagt-3'   |
| R548K-R        | 5'-actggtggccgtc <b>ctt</b> catcgtggtgtcg-3' |
| R548Q-F        | 5'-gacaccacgatg <b>caag</b> acggcaccagt-3'   |
| R548Q-R        | 5'-actggtggccgtc <b>ctt</b> catcgtggtgtc-3'  |
| R548A-F        | 5'-cgacaccacgatg <b>gcc</b> gacggcaccagt-3'  |
| R548A-R        | 5'-actggtggccgtc <b>ggc</b> catcgtggtgtcg-3' |
| Q552N-F        | 5'-gcgcgacggccaca <b>aact</b> cgtgctcgca-3'  |
| Q552N-R        | 5'-ttgcgagcagc <b>gagt</b> tgggccgtcggc-3'   |
| Q552A-F        | 5'-gcgcgacggccac <b>gcg</b> tcctgctcgca-3'   |
| Q552A-R        | 5'-tgcgagcagc <b>gacgc</b> tgggccgtcggc-3'   |

<sup>a</sup>Bold indicates the mutated nucleotides.
