# Supplementary material
Source: PubMed Central journal article supplement (PMC2864305)
Supplement: NIHMS188985-supplement-2_si_002.pdf [file NIHMS188985-supplement-2_si_002.pdf]

**Table S2**

Biotin-dependent oxaloacetate decarboxylation activities of mutant RePCs in the absence of oxamate at different concentrations of oxaloacetate<sup>a</sup>

|                                   | addition <sup>b</sup> |        | [oxaloacetate] ( $\mu$ M) |                 |                 |
|-----------------------------------|-----------------------|--------|---------------------------|-----------------|-----------------|
|                                   | enzyme                | avidin | 200                       | 100             | 25              |
| <b>R548K</b>                      |                       |        |                           |                 |                 |
| $k_{cat1}$                        | +                     | +      | $4.01 \pm 0.47$           | $3.34 \pm 0.22$ | $1.83 \pm 0.29$ |
| $k_{cat2}$                        | +                     | -      | $3.69 \pm 0.57$           | $3.55 \pm 0.81$ | $1.97 \pm 0.10$ |
| % of activity dependent on biotin |                       |        | 0                         | 0               | 0               |
| <b>Q552N</b>                      |                       |        |                           |                 |                 |
| $k_{cat1}$                        | +                     | +      | $3.43 \pm 0.33$           | $3.89 \pm 0.44$ | $1.19 \pm 0.22$ |
| $k_{cat2}$                        | +                     | -      | $3.52 \pm 0.50$           | $3.50 \pm 0.42$ | $1.03 \pm 0.40$ |
| % of activity dependent on biotin |                       |        | 0                         | 0               | 0               |
| <b>Q552A</b>                      |                       |        |                           |                 |                 |
| $k_{cat1}$                        | +                     | +      | $2.38 \pm 0.20$           | $1.67 \pm 0.09$ | $0.75 \pm 0.09$ |
| $k_{cat2}$                        | +                     | -      | $2.21 \pm 0.27$           | $1.63 \pm 0.13$ | $0.81 \pm 0.17$ |
| % of activity dependent on biotin |                       |        | 0                         | 0               | 0               |

<sup>a</sup>The apparent  $k_{cat}$  values are have units of  $\text{min}^{-1}$ . Reported values are means  $\pm$  standard deviations, of three separate determinations. <sup>b</sup>Pyruvate carboxylase and avidin used for each reaction were 50  $\mu$ g and 150  $\mu$ g, respectively. <sup>c</sup> $k_{cat1}$  is the apparent rate constant for biotin-independent oxaloacetate decarboxylation. <sup>d</sup>  $k_{cat2}$  is the apparent rate constant for biotin-dependent plus biotin-independent oxaloacetate decarboxylation and <sup>e</sup>Percent of activity dependent on biotin was calculated as  $100(k_{cat2} - k_{cat1}) / k_{cat2}$ . Statistical analysis showed that in all cases  $k_{cat1}$  and  $k_{cat2}$  were not significantly different using a T-test ( $p > 0.05$ ).
